**Table 3. Interfaces.** Web DNS under the \*.cyverse.org address

| <b>Interfaces</b>     | <b>Address (URL)</b>                                                          | <b>Role</b>                                                |
|-----------------------|-------------------------------------------------------------------------------|------------------------------------------------------------|
| Public Homepage       | <a href="https://cyverse.org">https://cyverse.org</a>                         | Landing Page, News, Links                                  |
| User Portal           | <a href="https://user.cyverse.org">https://user.cyverse.org</a>               | Enrollment, Features, Requests                             |
| Core Software Docs    | <a href="https://docs.cyverse.org">https://docs.cyverse.org</a>               | DevOps Documentation                                       |
| Learning Center       | <a href="https://learning.cyverse.org">https://learning.cyverse.org</a>       | Education, Training, Documentation                         |
| DNA Subway            | <a href="https://dnasubway.cyverse.org/">https://dnasubway.cyverse.org/</a>   | Education, Training                                        |
| DataCommons           | <a href="https://datacommons.cyverse.org">https://datacommons.cyverse.org</a> | Data Metadata (with DOI)                                   |
| WebDav                | <a href="https://data.cyverse.org">https://data.cyverse.org</a>               | Data Transfers ( <a href="https://">https://</a> protocol) |
| Discovery Environment | <a href="https://de.cyverse.org">https://de.cyverse.org</a>                   | Data Science Workbench                                     |
| Atmosphere            | <a href="https://atmo.cyverse.org">https://atmo.cyverse.org</a>               | Cloud Service (Deprecated)                                 |
| CACAO                 | <a href="https://cacao.cyverse.org">https://cacao.cyverse.org</a>             | Cloud Automation & Orchestration                           |
| BisQue                | <a href="https://bisque.cyverse.org">https://bisque.cyverse.org</a>           | Images, Views, Annotations                                 |
| Harbor                | <a href="https://harbor.cyverse.org">https://harbor.cyverse.org</a>           | Container Registry                                         |
| KeyCloak              | <a href="https://kc.cyverse.org">https://kc.cyverse.org</a>                   | Authentication, Authorization                              |
| API                   | <a href="https://de.cyverse.org/">https://de.cyverse.org/...</a>              | Swagger API, Metadata                                      |
| Internal Wiki         | <a href="https://wiki.cyverse.org">https://wiki.cyverse.org</a>               | Internal Documentation (Legacy & Deprecated)               |
